# Supplementary material
Source: MDPI journal article supplement (https://www.mdpi.com/2073-4441/14/11/1726)
Supplement: s1 [file s1]

**Table S1** Characteristics of secondary effluent quality.

| Water quality parameters | Units | Ranges of concentration | Mean values |
|--------------------------|-------|-------------------------|-------------|
| TOC                      | mg/L  | 8-10                    | 9.12        |
| BOD <sub>5</sub>         | mg/L  | 4-6                     | 5           |
| TN                       | mg/L  | 15-20                   | 16.4        |
| TP                       | mg/L  | 0.6-0.8                 | 0.7         |
| Turbidity                | NTU   | 2-5                     | 3.6         |
| Temperature              | °C    | 18-22                   | 20          |
| pH                       | -     | 5-7                     | 6.6         |

**Table S2** Fluorescence (EEM) intensity value of influent and effluent of UF process under different concentration conditions.

| Fe(II)/PMS        | Peak A           |           |                  |           | Peak B           |           |                  |           | Peak C           |           |                  |           | Peak D           |           |                  |           |
|-------------------|------------------|-----------|------------------|-----------|------------------|-----------|------------------|-----------|------------------|-----------|------------------|-----------|------------------|-----------|------------------|-----------|
| Dosage<br>(μM/μM) | Influent         |           | Effluent         |           |
|                   | Ex/Em<br>(nm/nm) | Intensity |
| 0/0               | 235/344          | 432.7     | 235/344          | 315.2     | 280/330          | 298.9     | 280/326          | 223.6     | 245/393          | 397.2     | 250/418          | 413.2     | 320/412          | 294.4     | 325/414          | 295.1     |
| 0/30              | 235/350          | 421.8     | 235/349          | 345.7     | 280/327          | 306.5     | 280/330          | 225.3     | 240/408          | 406       | 245/412          | 405.3     | 330/411          | 301.9     | 330/413          | 279.7     |
| 0/60              | 235/349          | 400.1     | 235/353          | 298.3     | 280/329          | 303.6     | 280/329          | 217.3     | 245/414          | 402.4     | 245/412          | 370.3     | 335/420          | 275.6     | 300/410          | 264.7     |
| 30/0              | 235/344          | 371.4     | 235/350          | 299.5     | 280/330          | 264.1     | 280/330          | 235.7     | 240/402          | 337.0     | 245/402          | 370.8     | 330/416          | 264.3     | 330/416          | 258.1     |
| 60/0              | 235/346          | 357.9     | 240/355          | 288.8     | 280/328          | 248.3     | 280/330          | 221.1     | 240/423          | 329.1     | 245/401          | 348.2     | 330/410          | 257.3     | 330/410          | 250.3     |
| 30/30             | 235/346          | 348.9     | 235/345          | 267.6     | 280/330          | 241.4     | 280/330          | 186.7     | 245/403          | 317.7     | 245/412          | 306.7     | 320/413          | 237.8     | 330/421          | 217.8     |
| 60/60             | 235/345          | 233.6     | 240/355          | 288.8     | 280/330          | 174.8     | 280/328          | 135.3     | 245/392          | 215.5     | 240/404          | 215.9     | 330/413          | 160.1     | 335/412          | 148.8     |
| 120/120           | 235/344          | 97.66     | 240/345          | 52.4      | 280/328          | 95.73     | 280/329          | 58.79     | 250/394          | 123.4     | 245/417          | 88.46     | 320/419          | 79.08     | 340/423          | 60.35     |

**Table S3** Correlation coefficient ( $R^2$ ) of membrane fouling models under different concentration conditions.

| Dosage ( $\mu\text{M}/\mu\text{M}$ ) | Cycle time | $R^2$             |                   |                     |                     |
|--------------------------------------|------------|-------------------|-------------------|---------------------|---------------------|
|                                      |            | Complete blocking | Standard blocking | Incomplete blocking | Sediment filtration |
| 0/0                                  | 1          | 0.9071            | 0.9989            | 0.9824              | 0.9967              |
|                                      | 2          | 0.91188           | 0.9898            | 0.9811              | 0.9975              |
|                                      | 3          | 0.9139            | 0.9864            | 0.9787              | 0.9977              |
| 0/30                                 | 1          | 0.8954            | 0.9986            | 0.9769              | 0.9979              |
|                                      | 2          | 0.9159            | 0.9873            | 0.9797              | 0.9977              |
|                                      | 3          | 0.9102            | 0.9935            | 0.9768              | 0.9978              |
| 0/60                                 | 1          | 0.9054            | 0.999             | 0.9817              | 0.997               |
|                                      | 2          | 0.9031            | 0.9914            | 0.9801              | 0.9976              |
|                                      | 3          | 0.8808            | 0.9889            | 0.9783              | 0.9977              |
| 30/0                                 | 1          | 0.9169            | 0.9991            | 0.9836              | 0.9966              |
|                                      | 2          | 0.9323            | 0.9931            | 0.9839              | 0.9959              |
|                                      | 3          | 0.9203            | 0.9905            | 0.9794              | 0.997               |
| 60/0                                 | 1          | 0.9202            | 0.9993            | 0.9841              | 0.9965              |
|                                      | 2          | 0.929             | 0.9924            | 0.9829              | 0.9964              |
|                                      | 3          | 0.9211            | 0.9903            | 0.9798              | 0.997               |
| 30/30                                | 1          | 0.8674            | 0.9912            | 0.9816              | 0.9969              |
|                                      | 2          | 0.9178            | 0.9882            | 0.9806              | 0.9976              |
|                                      | 3          | 0.8893            | 0.9866            | 0.9783              | 0.9977              |
| 60/60                                | 1          | 0.9416            | 0.9963            | 0.988               | 0.9948              |
|                                      | 2          | 0.9362            | 0.9903            | 0.9752              | 0.9933              |
|                                      | 3          | 0.9299            | 0.9942            | 0.9739              | 0.9939              |
